# Supplementary material for: Exact Winkler Solution for Laterally Loaded Piles in Inhomogeneous Soil
Source: Atypon-hosted journal article supplement (doi:10.1061/(asce)em.1943-7889.0002125), 2022-09-07
Supplement: supplemental_materials_em.1943-7889.0002125_crispin.pdf [file supplemental_materials_em.1943-7889.0002125_crispin.pdf]

## SUPPLEMENTAL MATERIALS

*ASCE Journal of Engineering Mechanics*

# Exact Winkler Solution for Laterally Loaded Piles in Inhomogeneous Soil

Jamie J. Crispin and George Mylonakis

**DOI:** 10.1061/(ASCE)EM.1943-7889.0002125

© ASCE 2022

[www.ascelibrary.org](http://www.ascelibrary.org)

### Calculation of head stiffness for short piles

For short piles ( $L < L_a$ ), the head stiffness terms are obtained using the boundary conditions at the pile head and pile tip. This can be carried out systematically using unitary shape functions  $N_m(z)$ , defined as follows:

$$y(z) = \mathbf{N}\mathbf{u}_0 = [N_1(z) \quad N_2(z) \quad N_3(z) \quad N_4(z)] \begin{bmatrix} y_0 \\ \theta_0 \\ y(L) \\ \theta(L) \end{bmatrix} \quad (\text{S1})$$

where  $\mathbf{N}$  and  $\mathbf{u}_0$  are the vectors of shape functions and displacement/rotation boundary conditions, respectively. Each shape function can be obtained from the following expression:

$$\mathbf{N} = [g_1(z) \quad g_2(z) \quad g_3(z) \quad g_4(z)] \begin{bmatrix} g_1(0) & g_2(0) & g_3(0) & g_4(0) \\ g_1'(0) & g_2'(0) & g_3'(0) & g_4'(0) \\ g_1(L) & g_2(L) & g_3(L) & g_4(L) \\ g_1'(L) & g_2'(L) & g_3'(L) & g_4'(L) \end{bmatrix}^{-1} \quad (\text{S2})$$

where  $g_m(z)$  are four independent solutions to the relevant governing equation.

Similarly to the case of a long pile case, a stiffness matrix,  $\mathbf{K}^*$ , can be obtained directly from the (exact) shape functions by differentiation. In this case, the matrix is  $4 \times 4$  corresponding to the total degrees of freedom:

$$\mathbf{K}^* = \begin{bmatrix} K_{11}^* & K_{12}^* & K_{13}^* & K_{14}^* \\ K_{21}^* & K_{22}^* & K_{23}^* & K_{24}^* \\ K_{31}^* & K_{32}^* & K_{33}^* & K_{34}^* \\ K_{41}^* & K_{42}^* & K_{43}^* & K_{44}^* \end{bmatrix} = EI \begin{bmatrix} N_1'''(0) & N_2'''(0) & N_3'''(0) & N_4'''(0) \\ N_1''(0) & N_2''(0) & N_3''(0) & N_4''(0) \\ N_1'''(L) & N_2'''(L) & N_3'''(L) & N_4'''(L) \\ N_1''(L) & N_2''(L) & N_3''(L) & N_4''(L) \end{bmatrix} \quad (\text{S3})$$

As only the pile head is of interest,  $\mathbf{K}^*$  can be reduced to a  $2 \times 2$  matrix,  $\mathbf{K}$ , using static condensation depending on the base boundary conditions. For fixed tip conditions, the third and fourth degrees of freedom of the pile are zero. Accordingly, the corresponding rows and columns of matrix  $\mathbf{K}^*$  can simply be eliminated to give:

$$\mathbf{K} = \begin{bmatrix} K_{11}^* & K_{12}^* \\ K_{21}^* & K_{22}^* \end{bmatrix} \quad (\text{S4})$$

For free tip conditions, the following expression is obtained:

$$\mathbf{K} = \begin{bmatrix} K_{11}^* & K_{12}^* \\ K_{21}^* & K_{22}^* \end{bmatrix} - \begin{bmatrix} K_{13}^* & K_{14}^* \\ K_{23}^* & K_{24}^* \end{bmatrix} \begin{bmatrix} K_{33}^* & K_{34}^* \\ K_{43}^* & K_{44}^* \end{bmatrix}^{-1} \begin{bmatrix} K_{31}^* & K_{32}^* \\ K_{41}^* & K_{42}^* \end{bmatrix} \quad (\text{S5})$$

Similarly, for hinged tip conditions:

$$\mathbf{K} = \begin{bmatrix} K_{11}^* & K_{12}^* \\ K_{21}^* & K_{22}^* \end{bmatrix} - \begin{bmatrix} K_{14}^* \\ K_{24}^* \end{bmatrix} [K_{44}^*]^{-1} \begin{bmatrix} K_{41}^* & K_{42}^* \end{bmatrix} \quad (\text{S6})$$

### Derivatives of Eqs. 11 and 26

The first three derivatives of the  $h_m(z)$  solutions (Eq. 11 and 26) are provided in Eqs. S7-S10. Note that  $\nu = l/(n+4)$  (Eq. 26e) and therefore for the linear stiffness profile ( $n = l$ ),  $\nu = l/5$ .

$$h_1'(z) = \lambda \frac{-(n+4)(\lambda z)^{n+3}}{(n+1)(n+2)(n+3)} {}_0F_3 \left( ; 2 - \nu, 2 - 2\nu, 2 - 3\nu; -\nu^3(\lambda z)^{\frac{1}{\nu}} \right) \quad (\text{S7a})$$

$$h_1''(z) = \lambda^2 \frac{-(n+4)(\lambda z)^{n+2}}{(n+1)(n+2)} {}_0F_3 \left( ; 1 - \nu, 2 - 2\nu, 2 - 3\nu; -\nu^3(\lambda z)^{\frac{1}{\nu}} \right) \quad (\text{S7b})$$

$$h_1'''(z) = \lambda^3 \frac{-(n+4)(\lambda z)^{n+1}}{(n+1)} {}_0F_3 \left( ; 1 - \nu, 1 - 2\nu, 2 - 3\nu; -\nu^3(\lambda z)^{\frac{1}{\nu}} \right) \quad (\text{S7c})$$

$$h_2'(z) = \lambda(\lambda z)^0 {}_0F_3 \left( ; 1 - \nu, 1 - 2\nu, \nu; -\nu^3(\lambda z)^{\frac{1}{\nu}} \right) \quad (\text{S8a})$$

$$h_2''(z) = \lambda^2 \frac{-(n+4)(\lambda z)^{n+3}}{(n+2)(n+3)} {}_0F_3 \left( ; 2 - \nu, 2 - 2\nu, 1 + \nu; -\nu^3(\lambda z)^{\frac{1}{\nu}} \right) \quad (\text{S8b})$$

$$h_2'''(z) = \lambda^3 \frac{-(n+4)(\lambda z)^{n+2}}{(n+2)} {}_0F_3 \left( ; 1 - \nu, 2 - 2\nu, 1 + \nu; -\nu^3(\lambda z)^{\frac{1}{\nu}} \right) \quad (\text{S8c})$$

$$h_3'(z) = \lambda(\lambda z)^1 {}_0F_3 \left( ; 1 - \nu, 2\nu, 1 + \nu; -\nu^3(\lambda z)^{\frac{1}{\nu}} \right) \quad (\text{S9a})$$

$$h_3''(z) = \lambda^2(\lambda z)^0 {}_0F_3 \left( ; 1 - \nu, 2\nu, \nu; -\nu^3(\lambda z)^{\frac{1}{\nu}} \right) \quad (\text{S9b})$$

$$h_3'''(z) = \lambda^3 \frac{-(n+4)(\lambda z)^{n+3}}{2(n+3)} {}_0F_3 \left( ; 2 - \nu, 1 + 2\nu, 1 + \nu; -\nu^3(\lambda z)^{\frac{1}{\nu}} \right) \quad (\text{S9c})$$

$$h_4'(z) = \lambda \frac{(\lambda z)^2}{2} {}_0F_3 \left( ; 3\nu, 1 + 2\nu, 1 + \nu; -\nu^3(\lambda z)^{\frac{1}{\nu}} \right) \quad (\text{S10a})$$

$$h_4''(z) = \lambda^2(\lambda z)^1 {}_0F_3 \left( ; 3\nu, 2\nu, 1 + \nu; -\nu^3(\lambda z)^{\frac{1}{\nu}} \right) \quad (\text{S10b})$$

$$h_4'''(z) = \lambda^3(\lambda z)^0 {}_0F_3 \left( ; 3\nu, 2\nu, \nu; -\nu^3(\lambda z)^{\frac{1}{\nu}} \right) \quad (\text{S10c})$$
